# Supplementary material for: The lncRNA HMS recruits RNA-binding protein HuR to stabilize the 3′-UTR of HOXC10 mRNA
Source: PubMed Central journal article supplement (PMC8363838; doi:10.1016/j.jbc.2021.100997), 2021-07-22
Supplement: mmc1.pdf [file mmc1.pdf]

## Supplementary Figure 1

**A**

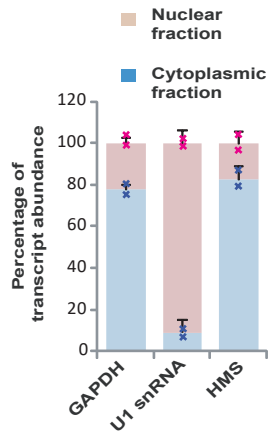

**B**

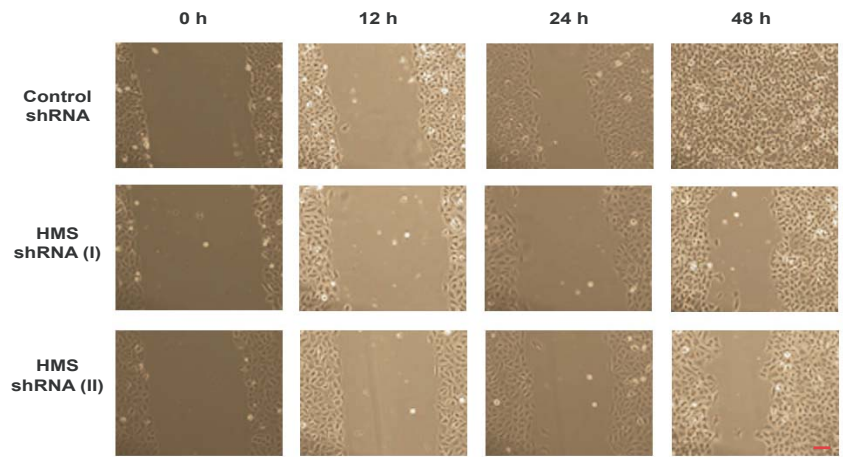

**Supplementary Figure 1.** *A*, Subcellular fractionation of MG63 cells followed by evaluation of abundance of the indicated transcripts by qRT-PCR in nuclear and cytoplasmic fractions. The bar-graph displays the percentage of the total amount of detected transcripts in different fractions. *GAPDH* and *U1 snRNA* serve as controls for cytoplasmic and nuclear fractions, respectively. The data is represented as mean  $\pm$  SD from two independent experiments. Markers in pink and blue colour point to individual data points of nuclear and cytoplasmic fractions, respectively. *B*, Effect of *HMS* depletion on wound healing assay. Representative fields of data shown in Fig. 2C. *HMS*-depleted U2OS cells were grown to confluence after which a wound was created using a micropipette tip. The extent of wound healing was monitored at the indicated time points. Scale bar, 100  $\mu$ m. Quantification of wound healing capability observed in shown in Fig. 2C.

**C**

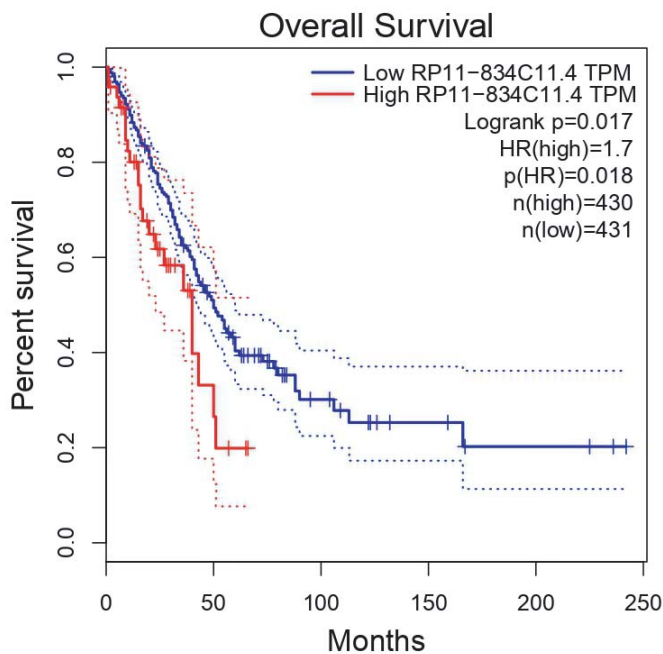

**D**

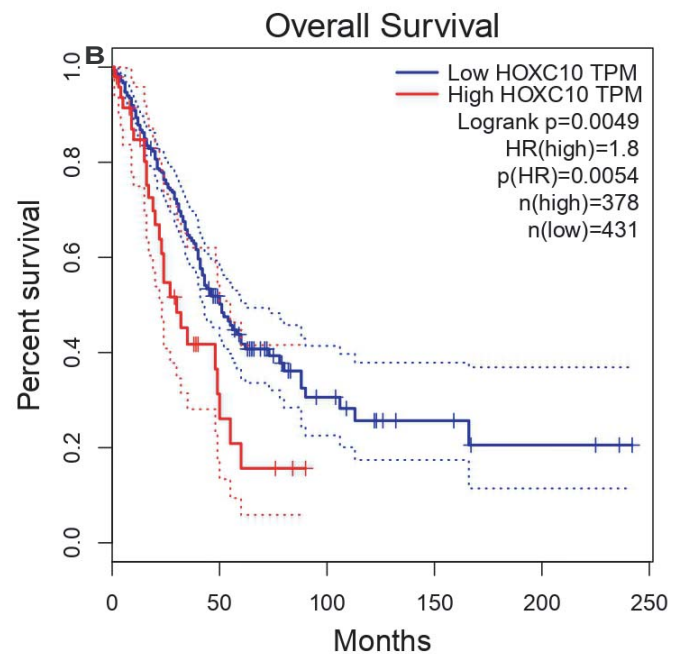

**Supplementary Figure 1.** *C-D*, Kaplan-Meier estimates of the survival of patients with low or high levels of expression of *HMS* and *HOXC10* in LUAD. The expression and survival information of *HMS* (*C*) and *HOXC10* (*D*) was downloaded from GEPIA (Gene Expression Profiling Interactive Analysis) platform. The survival probability with a high group cutoff of 10% and low group cutoff of 90% was calculated at 95% confidence interval.
